# Supplementary material for: Redox-responsive micellar-like nanoparticles can overcome intrinsic multi-drug resistance in tumour spheroids of triple negative breast cancer
Source: Royal Society of Chemistry journal article supplement (doi:10.1039/d4pm00336e), 2025-01-01
Supplement: d4pm00336e5.pdf [file d4pm00336e5.pdf]

## Western Blot Data files

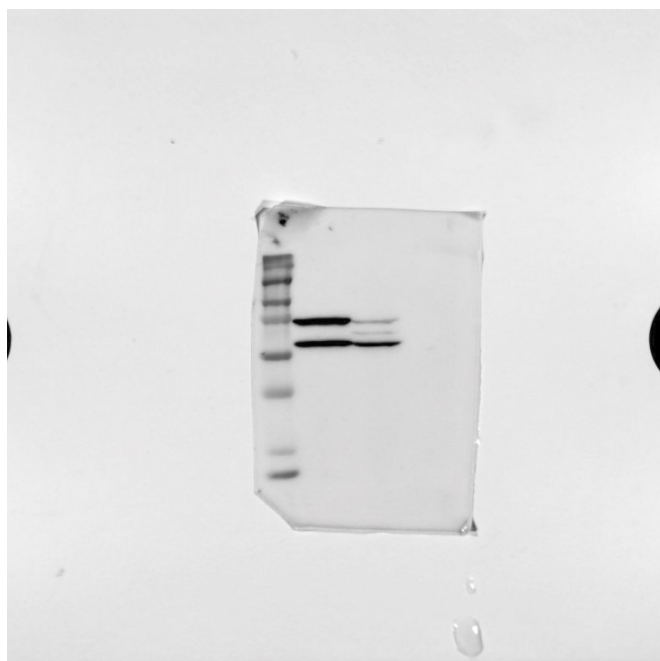

**Image 1** - Original gel scan - uncropped

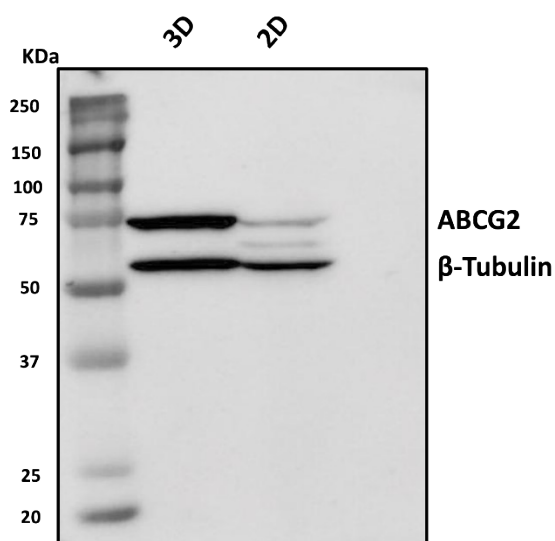

**Image 2** - Original gel scan - labelled

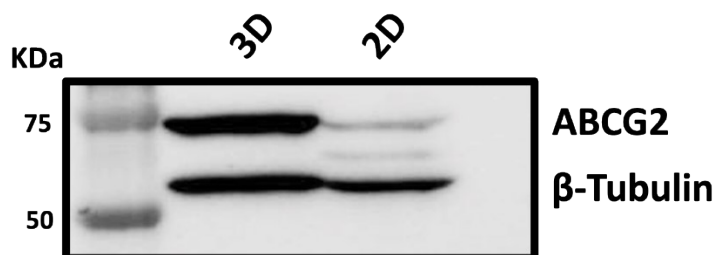

**Image 3** - Original gel scan – labelled and cropped to show key bands
