# Supplementary figures and images for: Redox-responsive micellar-like nanoparticles can overcome intrinsic multi-drug resistance in tumour spheroids of triple negative breast cancer
Source: Royal Society of Chemistry journal article supplement (doi:10.1039/d4pm00336e), 2025-01-01

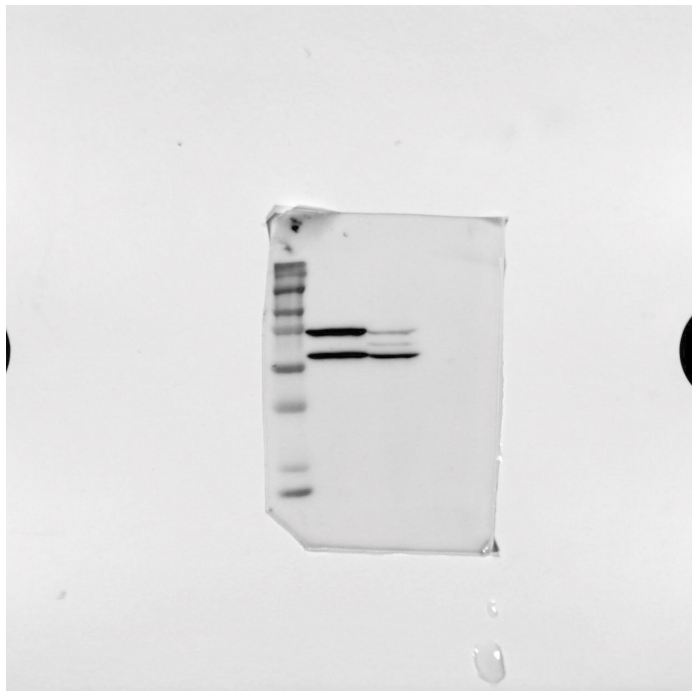

Supplement: d4pm00336e3.pdf [file d4pm00336e3.pdf]
